# Supplementary material for: UV Stimulated Manganese Dioxide for the Persulfate Catalytic Degradation of Bisphenol A
Source: MDPI journal article supplement (doi:10.3390/catal11040502), 2021-04-16
Supplement: s1 [file s1]

# **UV Stimulated Manganese Dioxide for the Persulfate Catalytic Degradation of Bisphenol A (Supplementary Materials)**

**Guihua Dong<sup>1</sup>, Bing Chen<sup>1\*</sup>, Bo Liu<sup>1</sup>, Stanislav R. Stoyanov<sup>2\*</sup>, Yiqi Cao<sup>1</sup>, Min Yang<sup>1</sup>, Baiyu Zhang<sup>1</sup>**

<sup>1</sup>Northern Region Persistent Organic Pollution Control (NRPOP) Laboratory, Faculty of Engineering and Applied Science, Memorial University of Newfoundland, St. John's, NL A1B 3X5, Canada

<sup>2</sup>Natural Resources Canada, CanmetENERGY Devon, 1 Oil Patch Drive, Devon, AB T9G 1A8, Canada

\*Corresponding authors: Bing Chen (bchen@mun.ca) and Stanislav R. Stoyanov (stanislav.stoyanov@canada.ca)

## Summary

**Text S1.** Persulfate detection methods

**Text S2.** Characterization of MnO<sub>2</sub> particles

**Text S3.** BPA derivatization and GC-MS analysis methods

**Figure S1.** PS residual in MnO<sub>2</sub>/PS, UV/PS, and MnO<sub>2</sub>/UV/PS processes.

**Figure S2.** Effects of radical inhibitors on BPA concentrations over 30 min for UV/MnO<sub>2</sub>.

**Figure S3.** XRD of MnO<sub>2</sub> before and after 2 h treatment in MnO<sub>2</sub>/UV/PS process

**Figure S4.** SEM image and EDS analysis of MnO<sub>2</sub> before and after 2 h treatment in MnO<sub>2</sub>/UV/PS process

**Figure S5.** Proposed derivatized intermediates and their possible ion fragments

**Figure S6.** Intermediates residue in MnO<sub>2</sub>/UV/PS process

**Figure S7.** Schematic diagram of experimental device

**Table S1.** Parameters of BPA degradation following the pseudo-first-order kinetics with and without quenching (reaction time: 30 min; D: degradation efficiency)

**Table S2.** Intermediates of BPA under the MnO<sub>2</sub>/UV/PS process identified using GC-MS

### **Text S1. Persulfate detection methods**

The persulfate concentration was determined by a modified spectrophotometric method. 0.5 M potassium iodide with bicarbonate buffer ( $\text{NaHCO}_3$ , 0.05 M) was prepared, and then 0.3 mL filtered sample was mixed with the above iodide solution (4.7 mL). Shaking well, and after 20 min reaction, the water sample was detected by spectrophotometer (UV-Vis) at  $\lambda = 352$  nm.

### **Text S2. Characterization of $\text{MnO}_2$ particles**

An X-ray powder diffractometer (XRD, Rigaku XtaLAB Synergy-S) was applied to determine the crystallographic structure of  $\text{MnO}_2$  particles before and after treatment in  $\text{MnO}_2/\text{UV}/\text{PS}$  process. The surface morphology of  $\text{MnO}_2$  particles before and after treatment in  $\text{MnO}_2/\text{UV}/\text{PS}$  process was measured by the scanning electron microscope (SEM, Quanta 400 MLA) equipped with energy-dispersive X-ray spectroscopy (EDS).

### **Text S3. BPA derivatization and GC-MS analysis methods**

We prepared six identical mixtures, each containing: 200 mL of water containing 30 mg/L BPA, 1 mM of PS, and 0.25 g/L  $\text{MnO}_2$ . Samples (30 mL) of each were taken from different flasks after 0, 5, 15, 30, 60, 90, and 120 min of UV treatment. Each sample was transferred into a separatory funnel, and 15 mL methylene chloride was immediately added to extract the BPA and its degradation intermediates. After agitation, the mixture was allowed to settle for 30 min, and the underlying organic phase was separated from the aqueous phase. A second 15 mL aliquot of methylene chloride was then used to recover any organic matter remaining in the separatory

funnel. The extract was dehydrated with anhydrous sodium sulfate, filtered, and concentrated to near dryness on a vacuum rotary evaporator. The residue was redissolved in 1 mL of toluene and transferred to a 1.5 mL brown vial, from which a 100  $\mu$ L aliquot was analyzed directly, and the remaining sample was derivatized before analysis. For derivatization, toluene was first removed from the remaining sample by evaporation to dryness under a gentle nitrogen stream, then 150  $\mu$ L of BSTFA+TMCS were added to silylate the polar degradation products in the residue. The silylation reaction was conducted by heating the mixture in a water bath for 2 h at 60 °C. Toluene (350  $\mu$ L) was added to the vial to dissolve the silylated products. Both the silylated and non-silylated aliquots were analyzed using gas chromatography. Chromatographic separation of analytes was carried out using a DB-5MS UI fused silica capillary column (30 m  $\times$  0.25 mm  $\times$  0.25  $\mu$ m). The inlet and detector temperatures of the gas chromatograph were set to 260 and 320 °C, respectively. The oven temperature was initially set to 80 °C and held for 3 min, then increased to 300 °C at 3 °C/min and held for 30 min. Helium was used as the carrier gas at the flow rate of 1.0 mL/min. The sample (2  $\mu$ L) was injected in the pulsed splitless mode. The temperatures of the transfer line, ion source, and mass spectrometry detector were 280, 230, and 150 °C, respectively. Qualitative analysis was performed in the electron impact mode at 70 eV using the full scan mode in the  $m/z$  range of 40–1000 [1, 2].

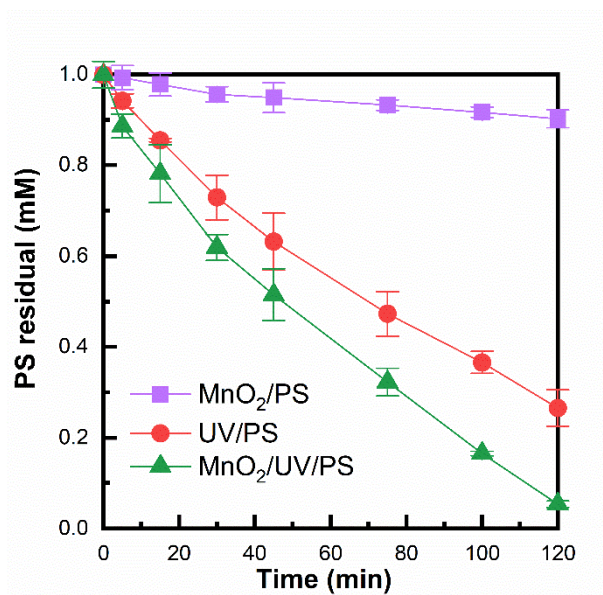

**Figure S1.** PS residual in MnO<sub>2</sub>/PS, UV/PS, and MnO<sub>2</sub>/UV/PS processes

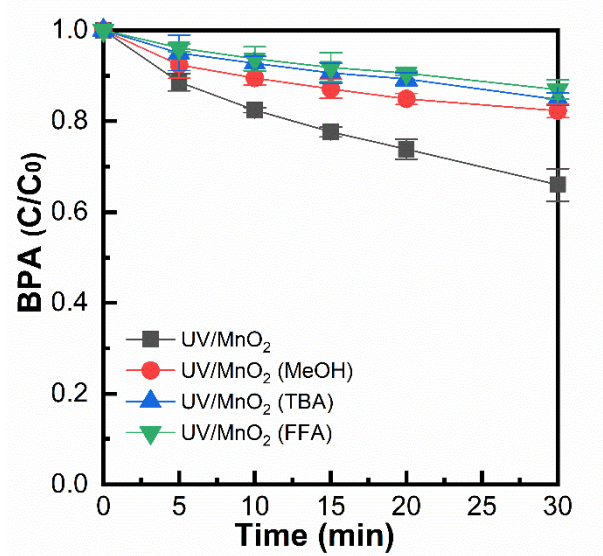

**Figure S2.** Effects of radical inhibitors on BPA concentrations over 30 min for UV/MnO<sub>2</sub>. Initial conditions: [BPA] = 30 mg/L, Ph = 6.5, [PS] = 1 mM, [MnO<sub>2</sub>] = 0.25 g/L. When inhibitor is used, initial [MeOH] = 1 M or [TBA] = 1 M or [FFA] = 5 mM.

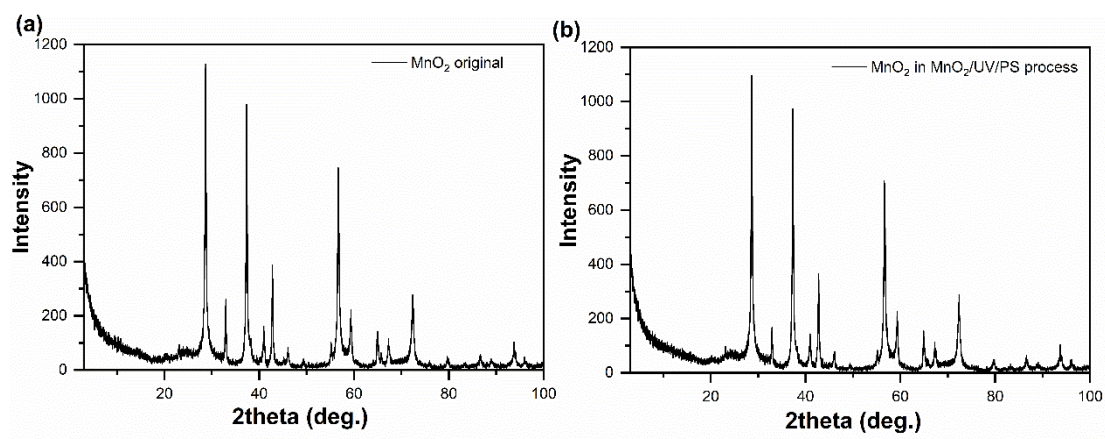

**Figure S3.** XRD of MnO<sub>2</sub> before (a) and after (b) 2 h treatment in MnO<sub>2</sub>/UV/PS process

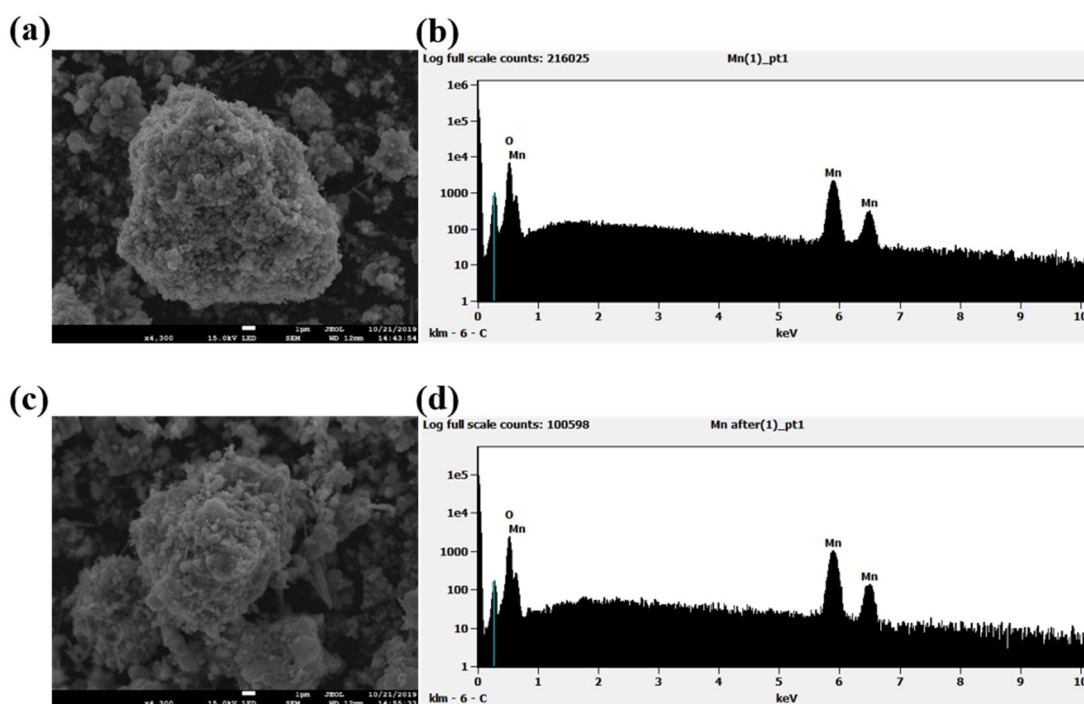

**Figure S4.** SEM image and EDS analysis of MnO<sub>2</sub> before (a, b) and after (c, d) 2 h treatment in MnO<sub>2</sub>/UV/PS process

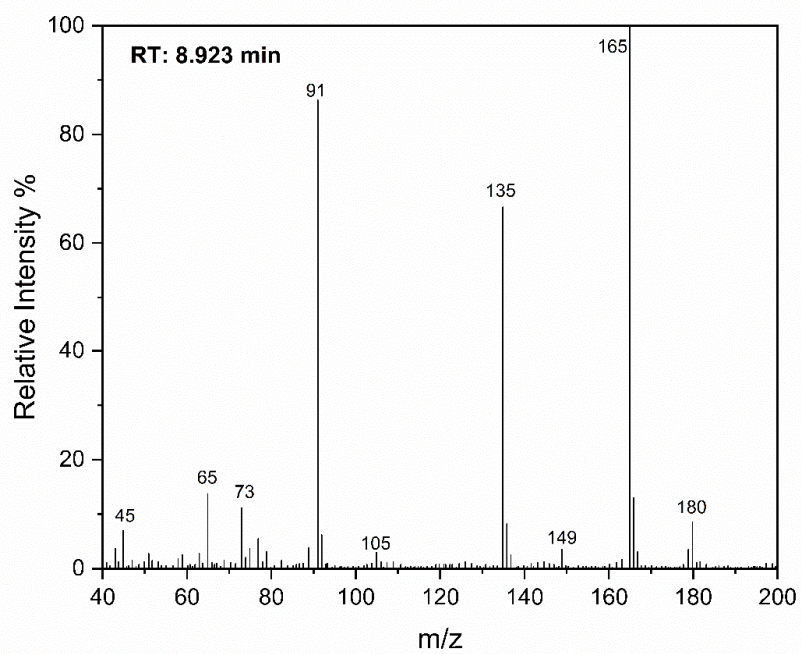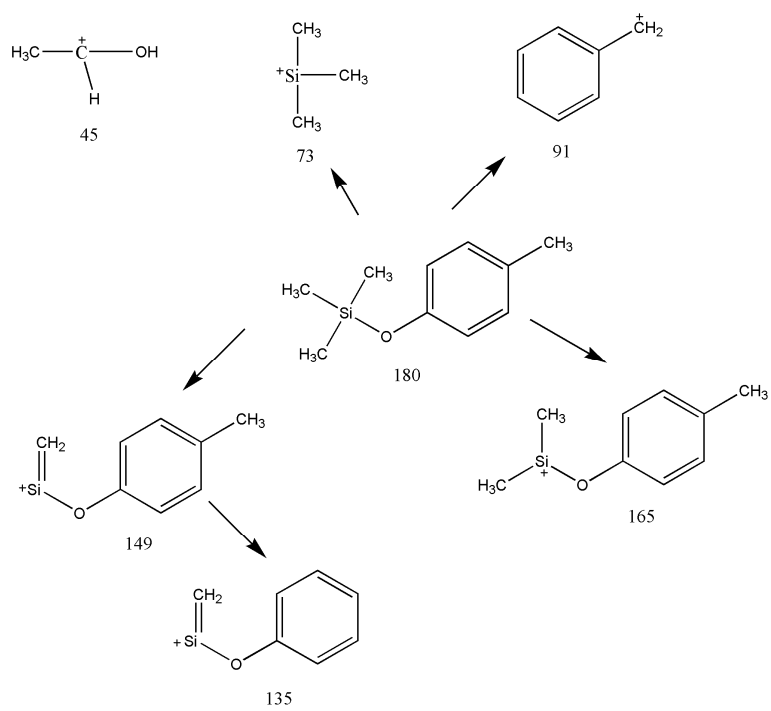

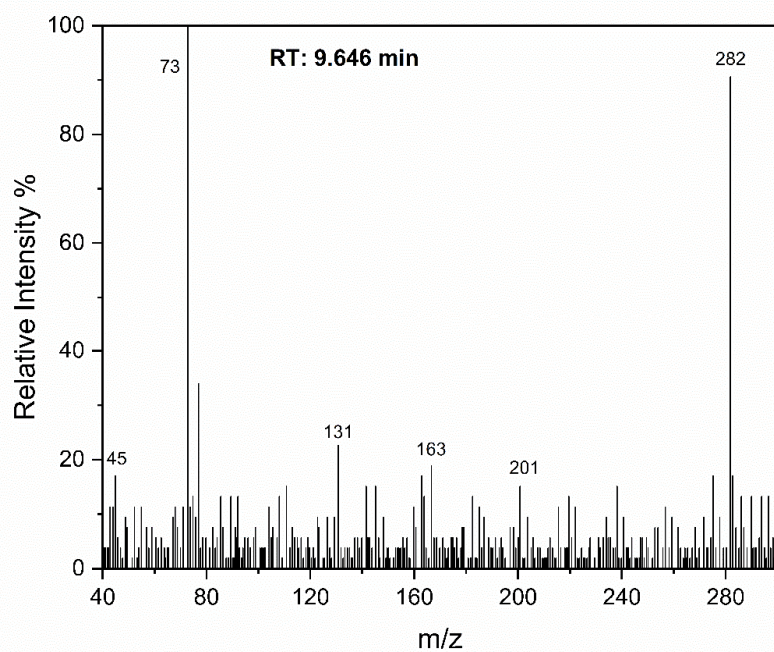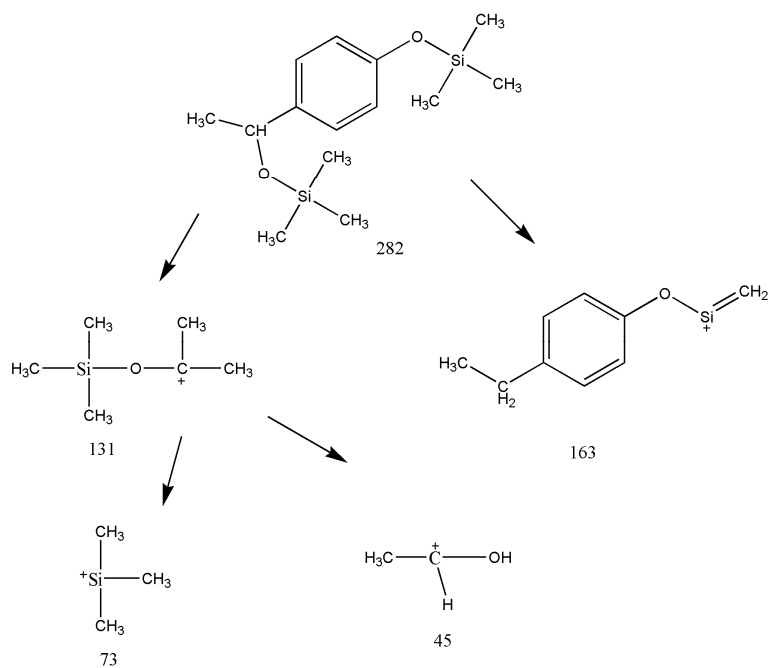

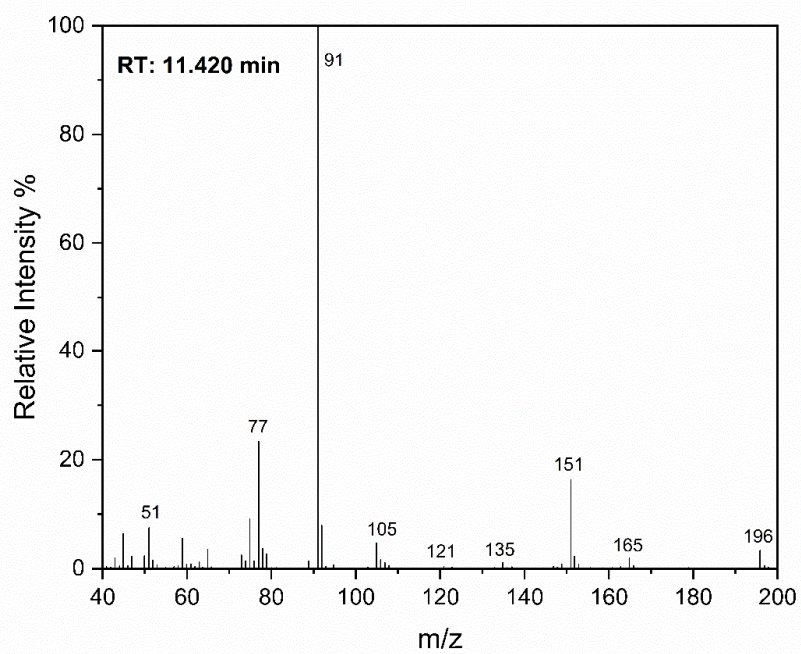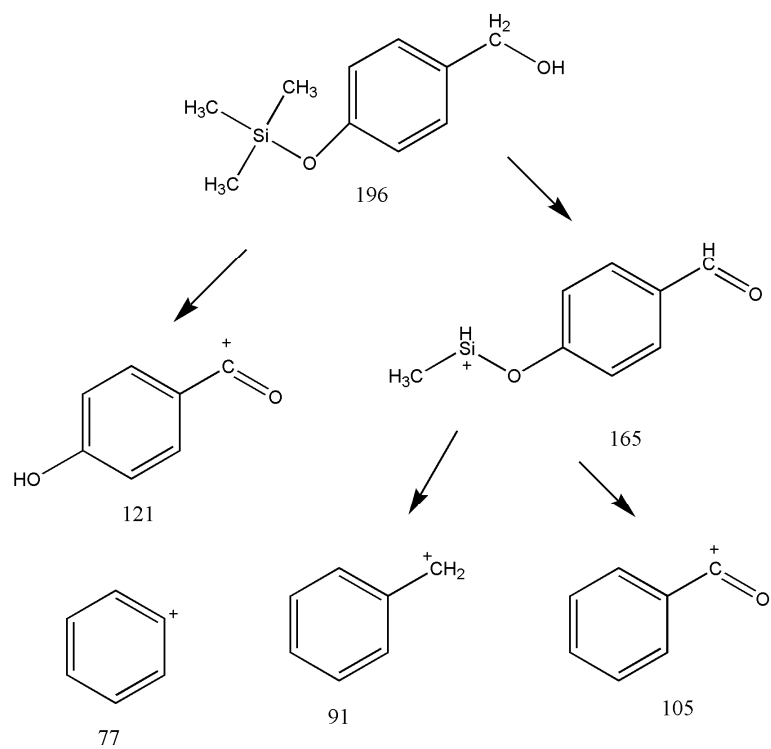

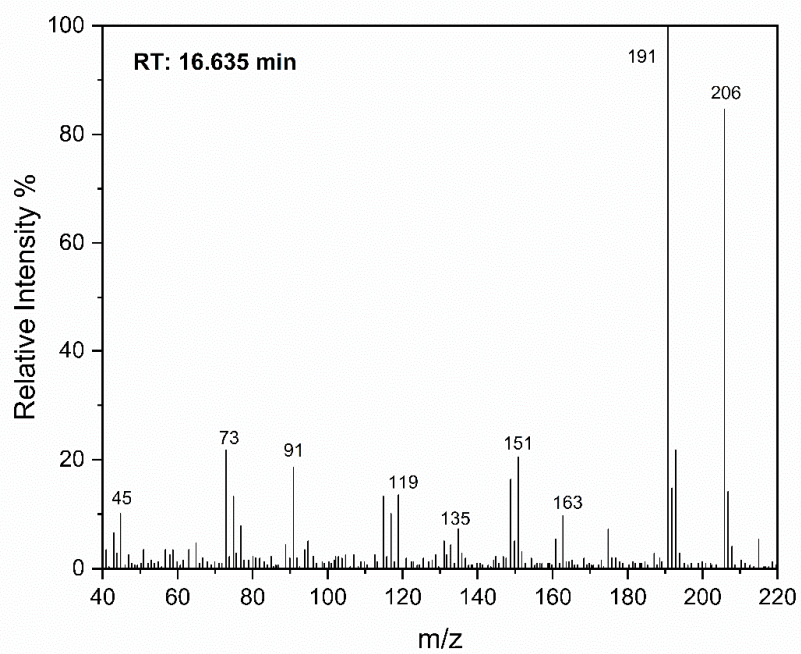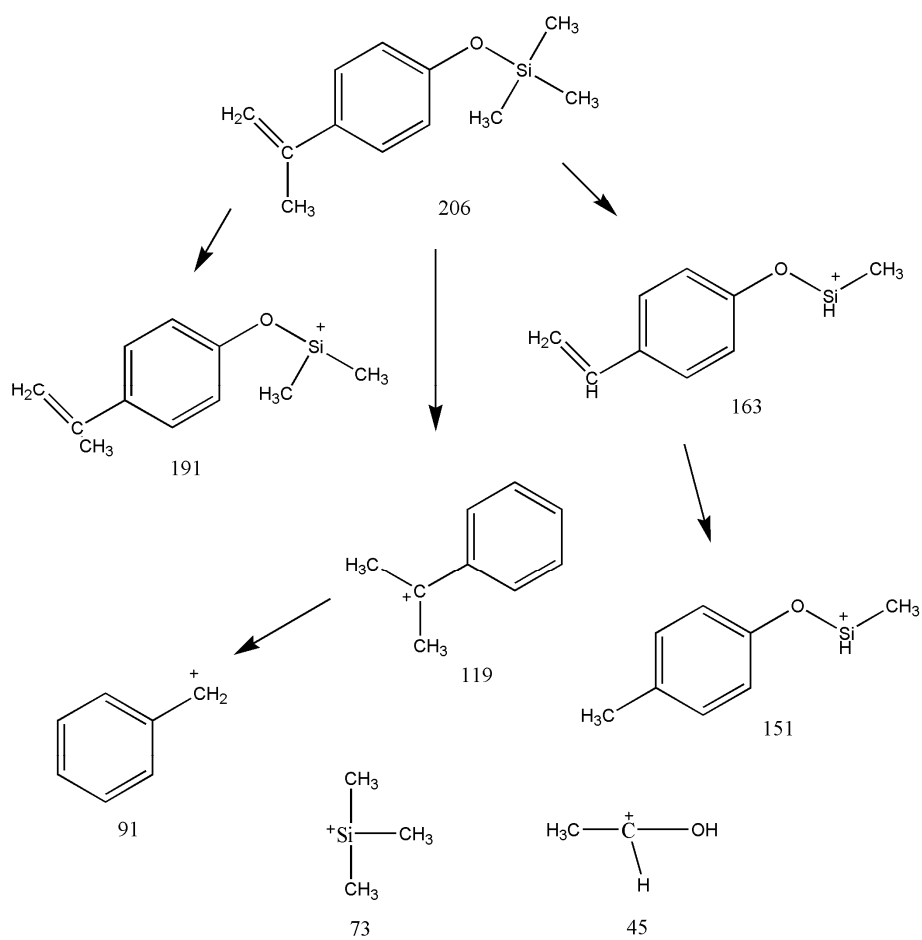

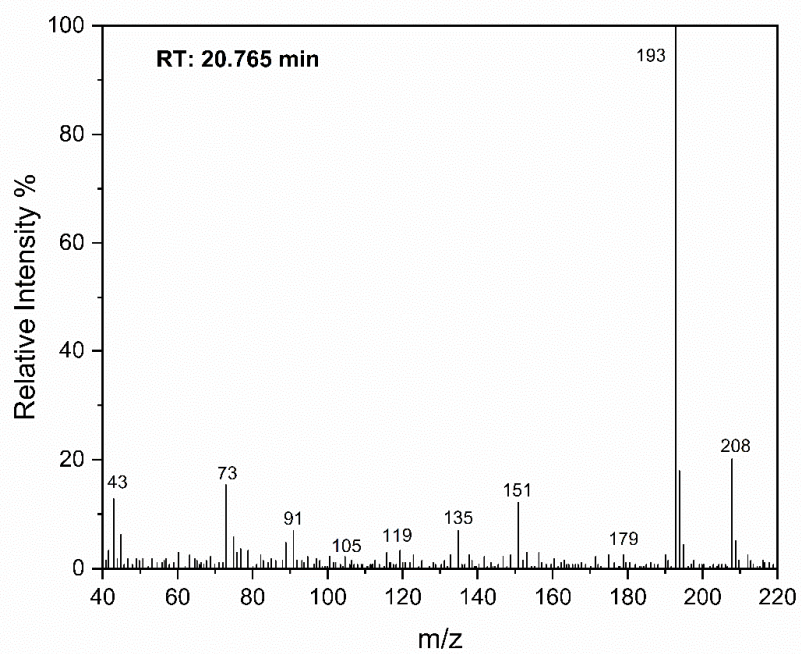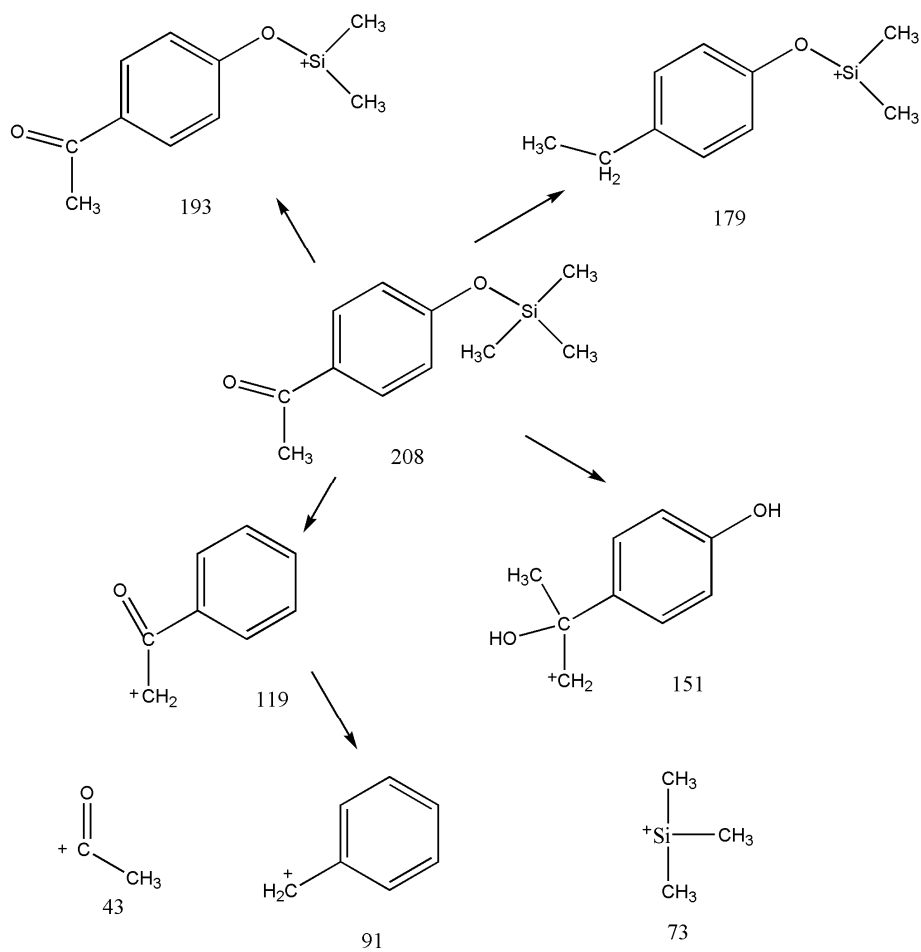

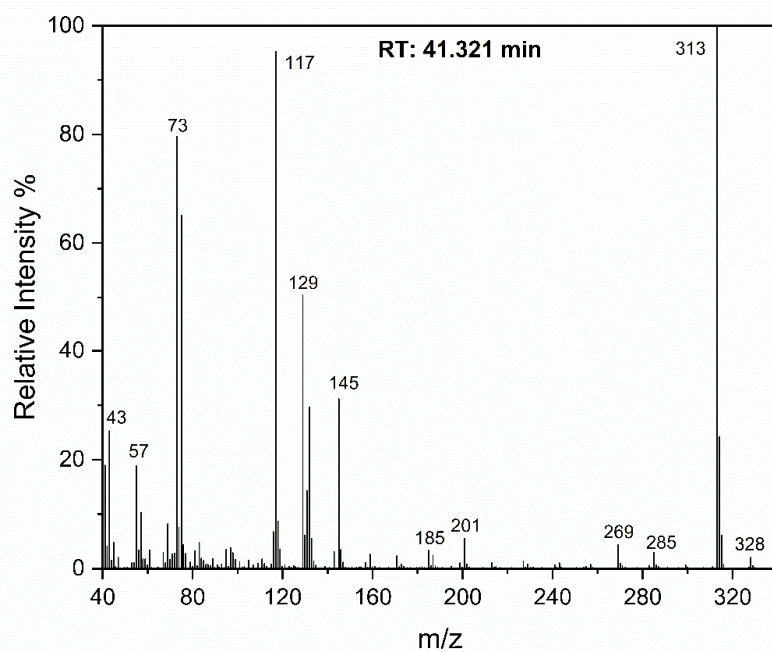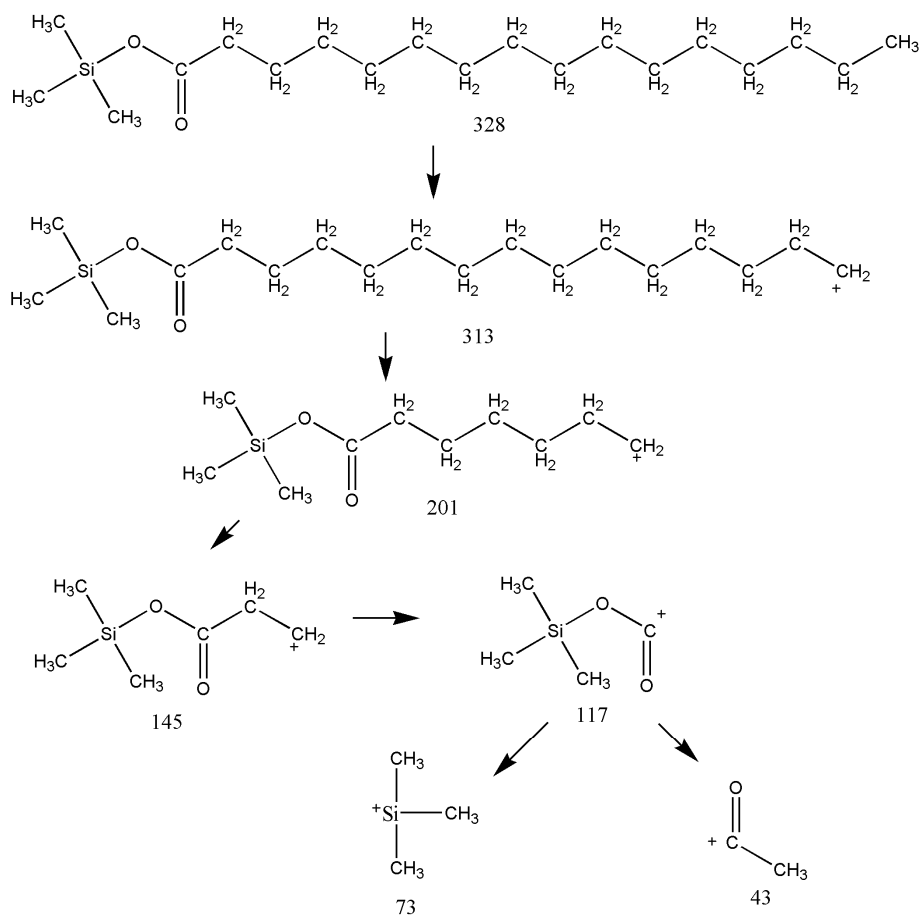

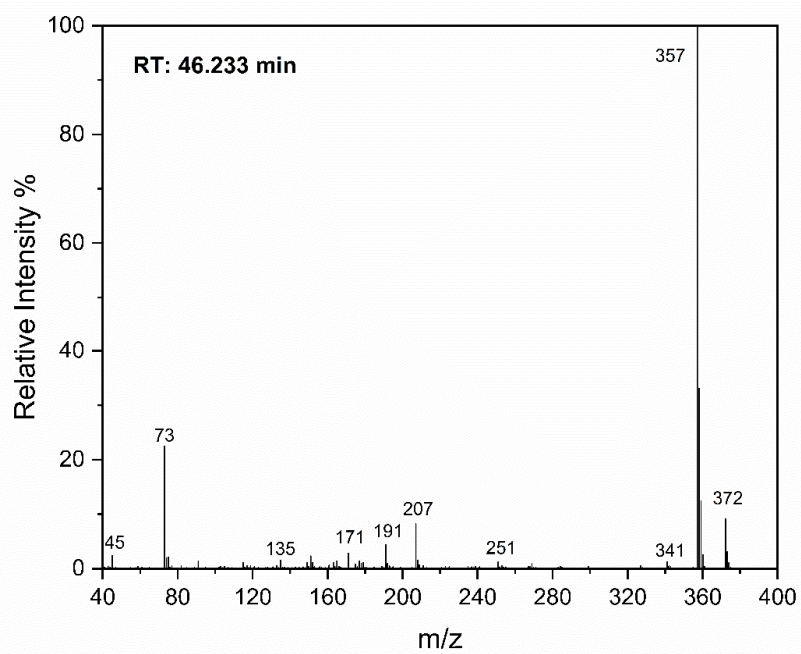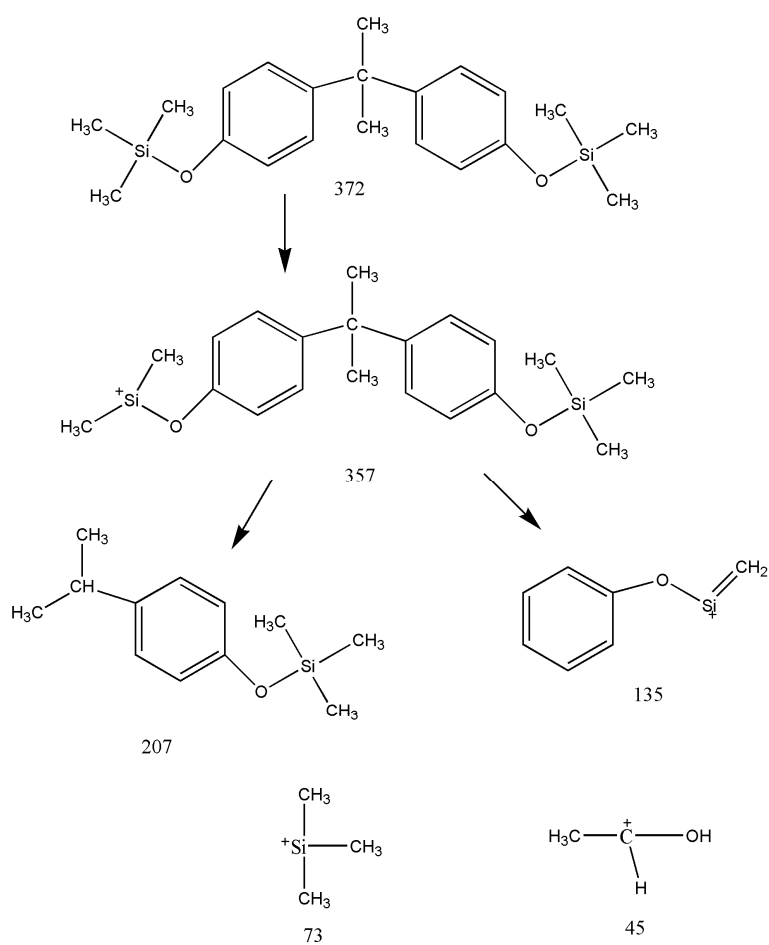

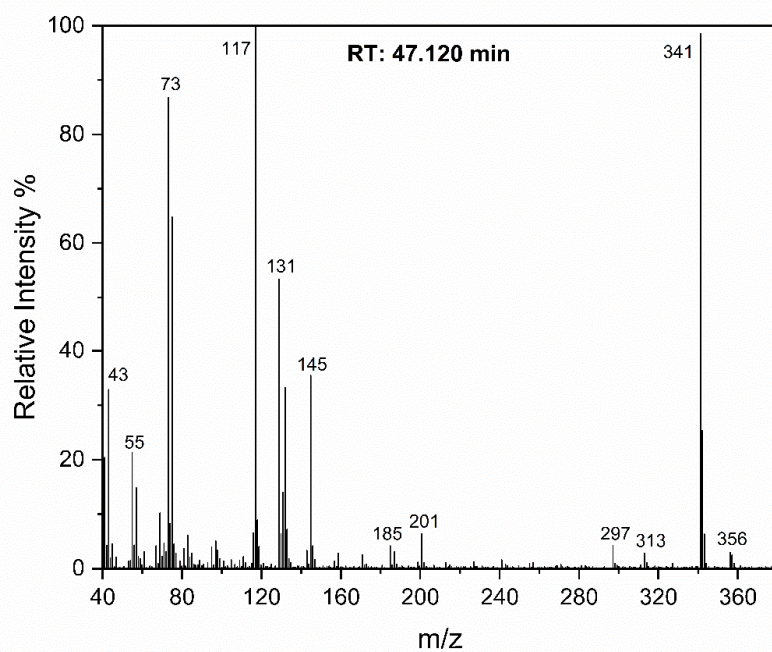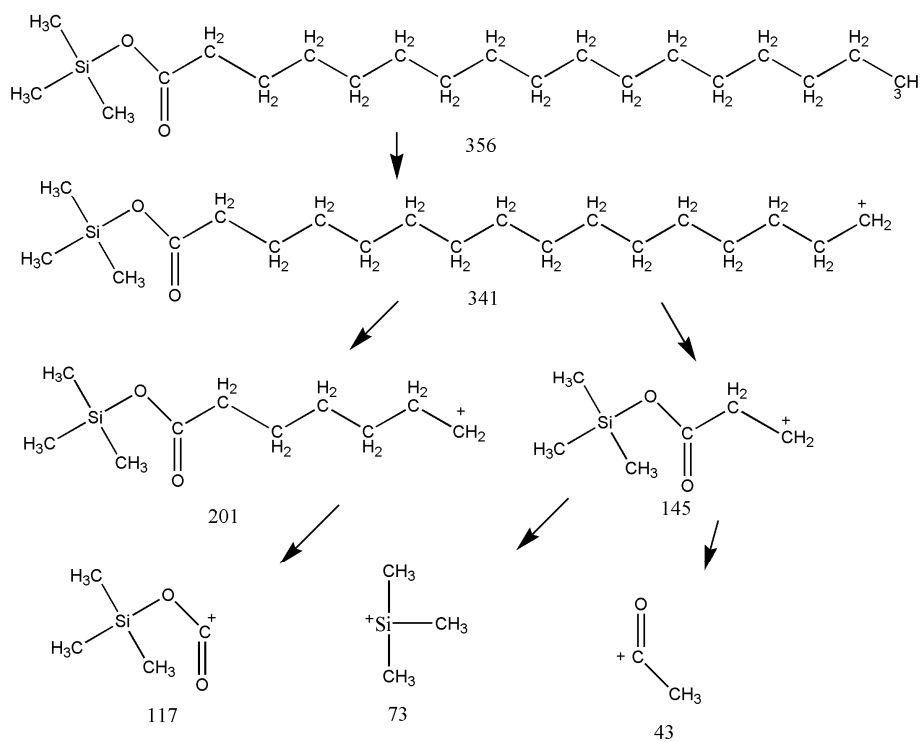

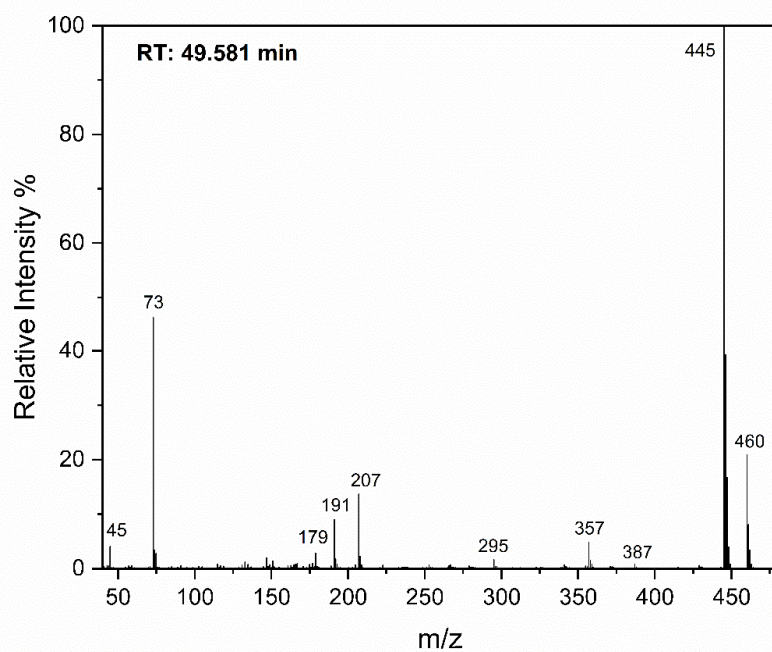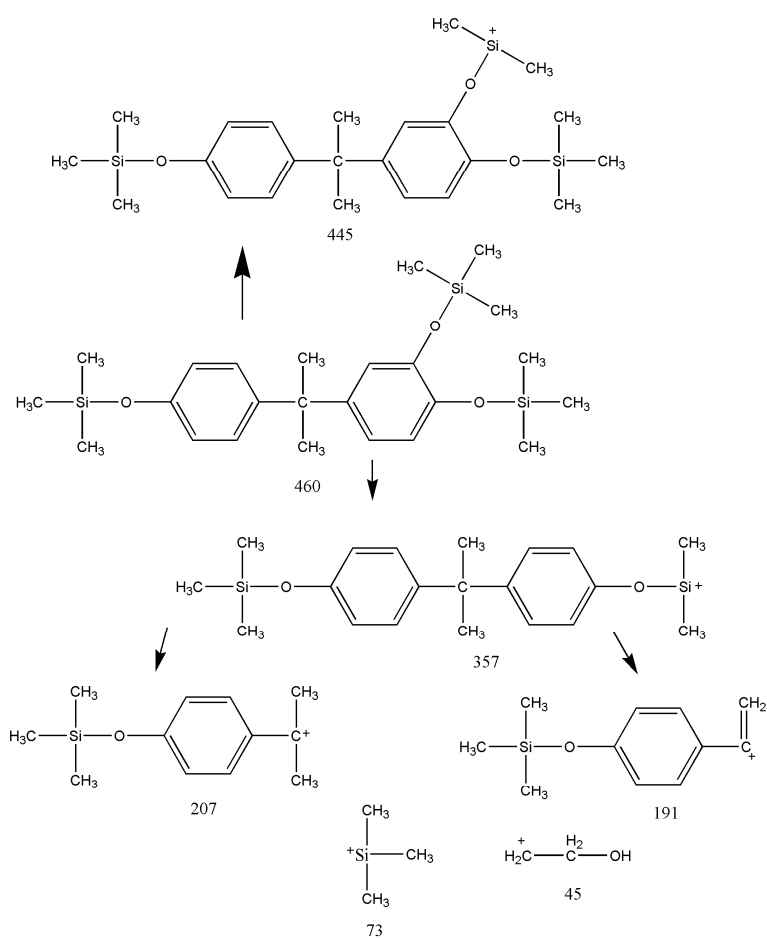

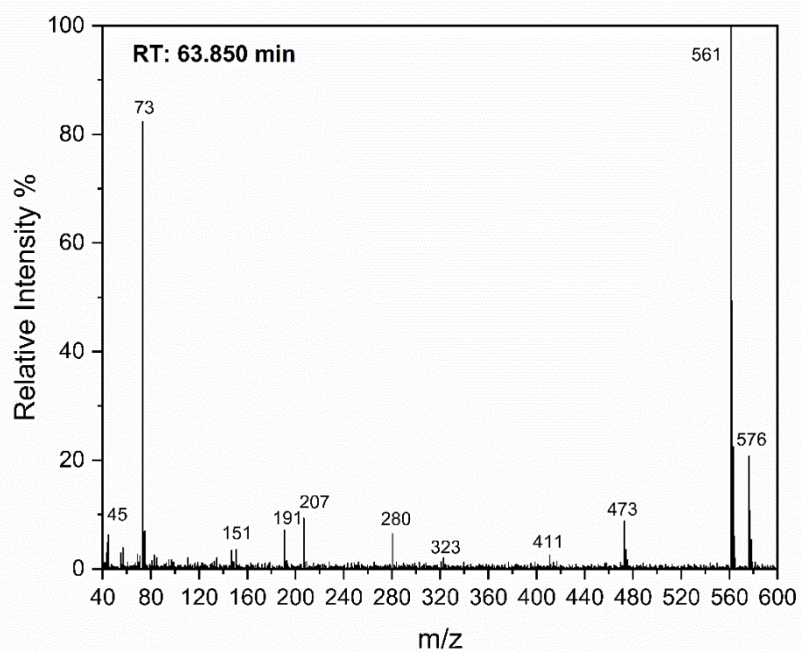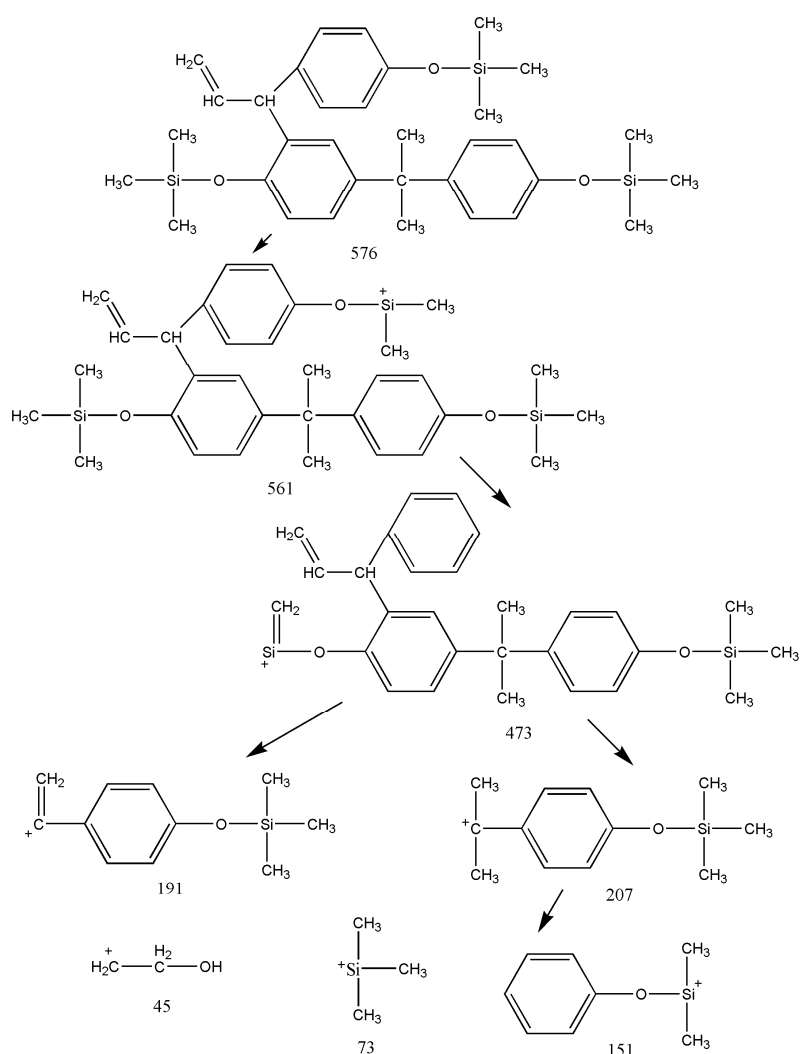

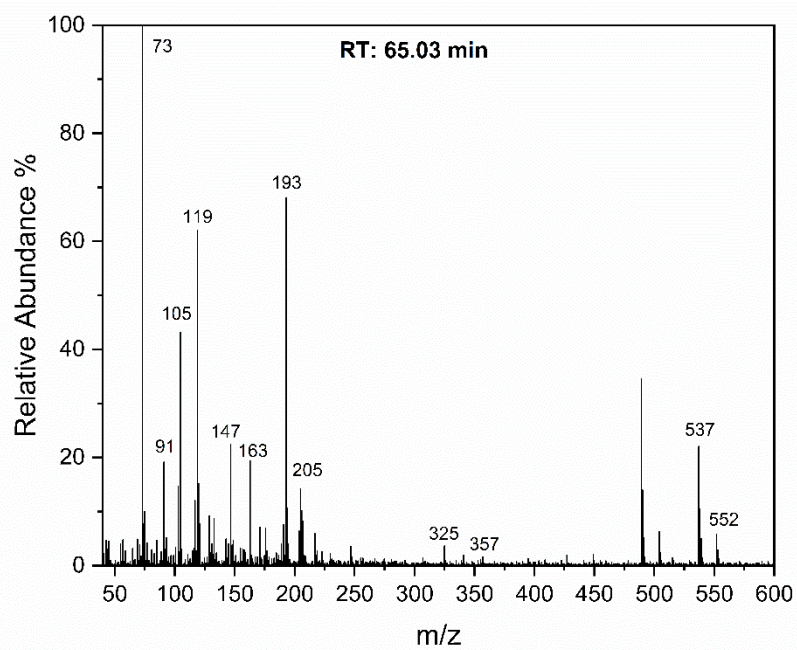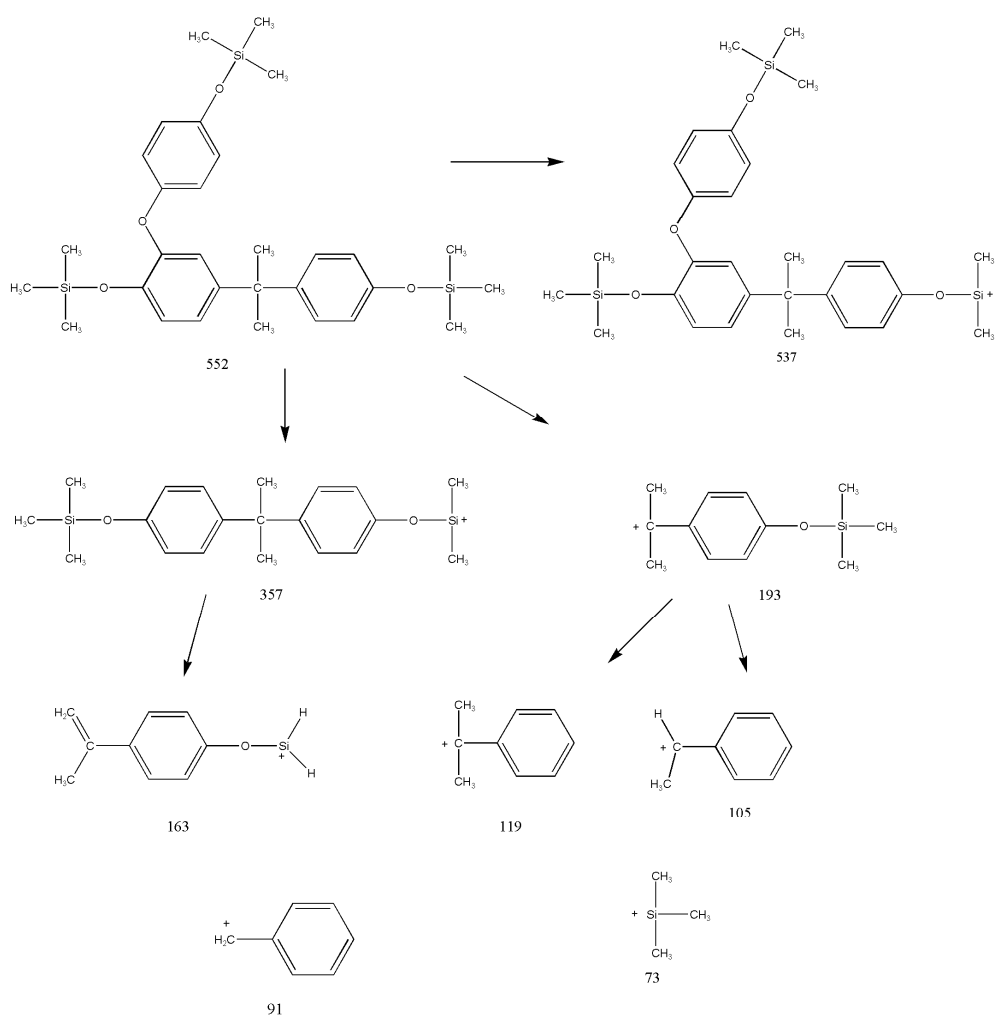

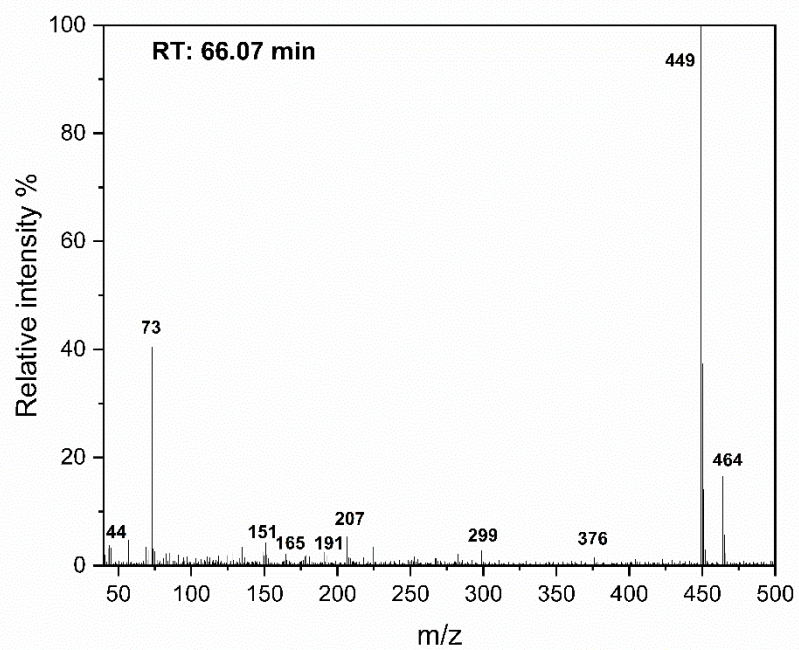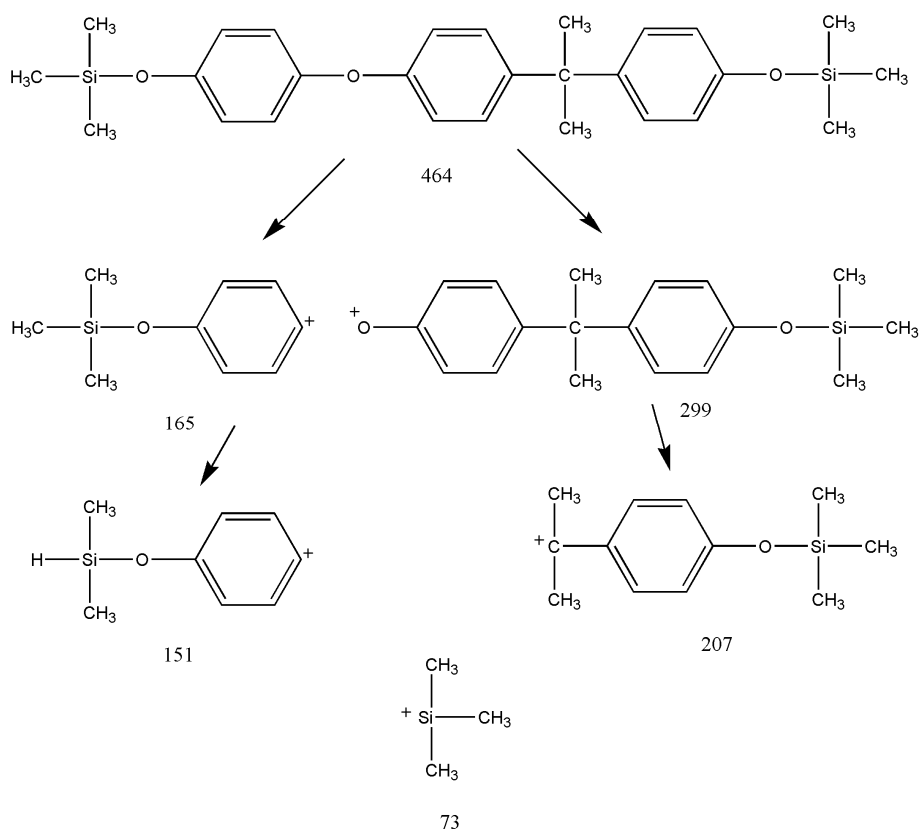

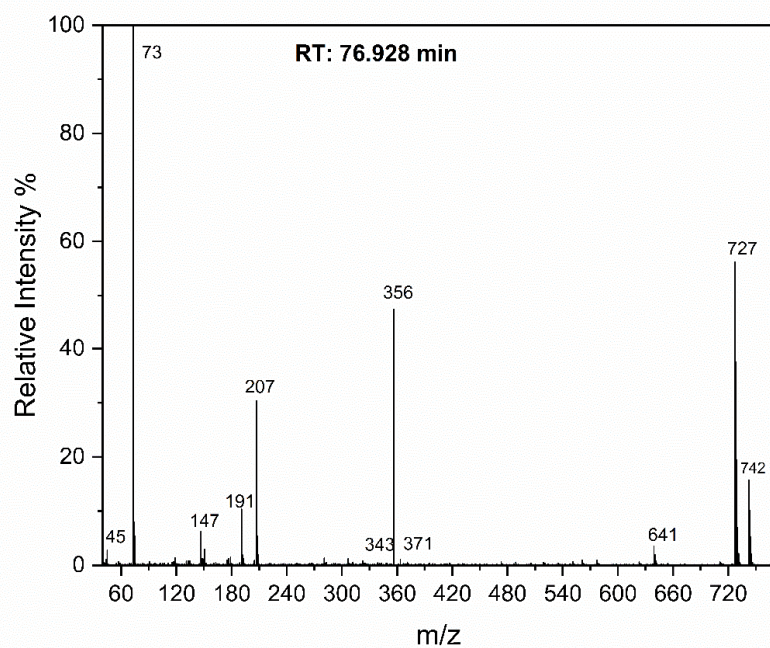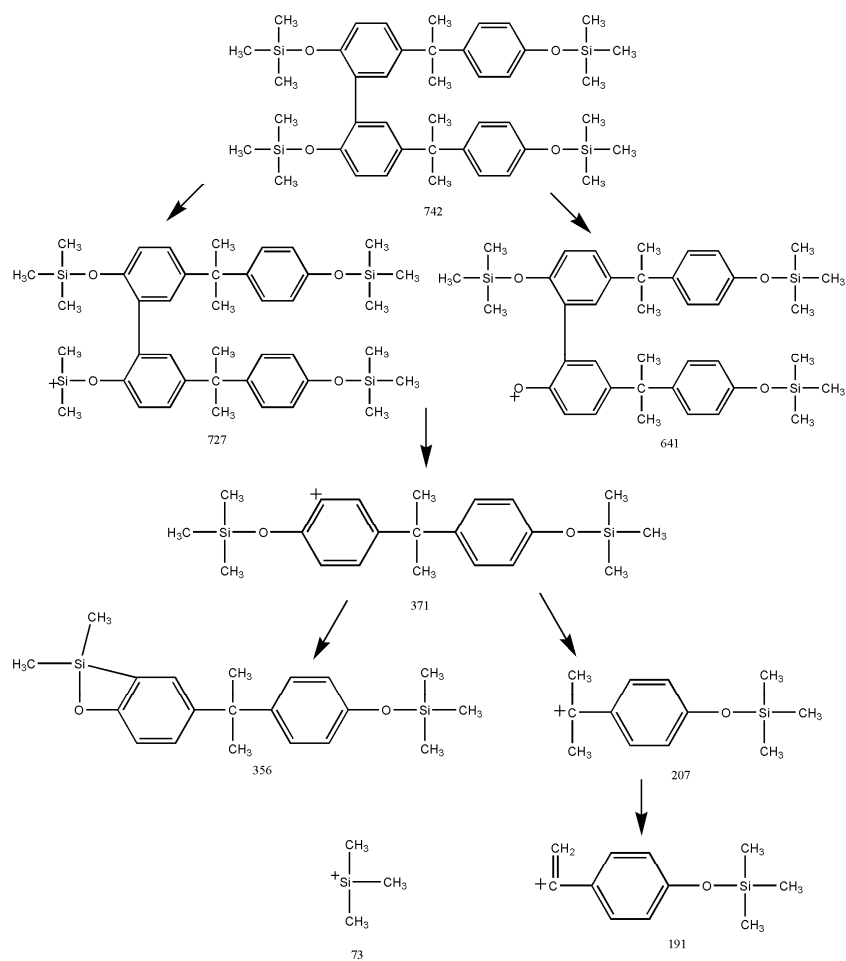

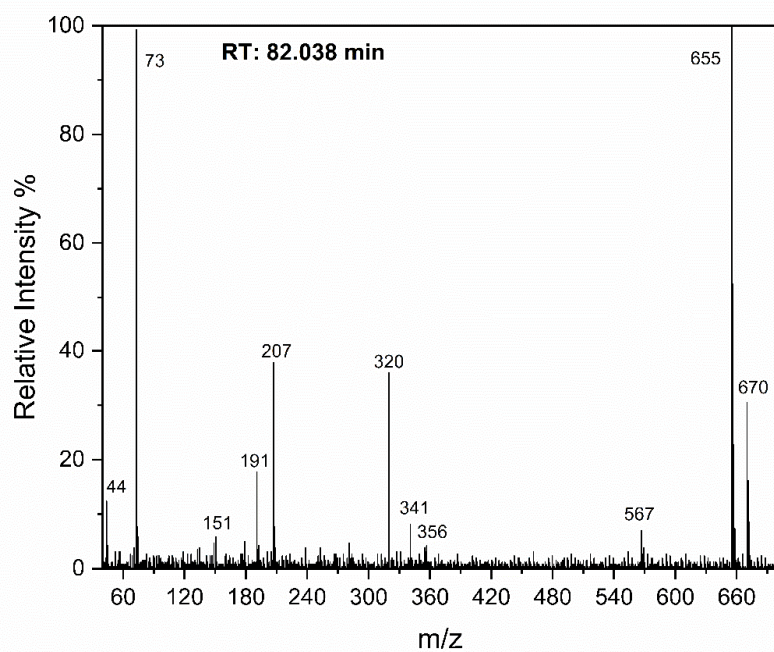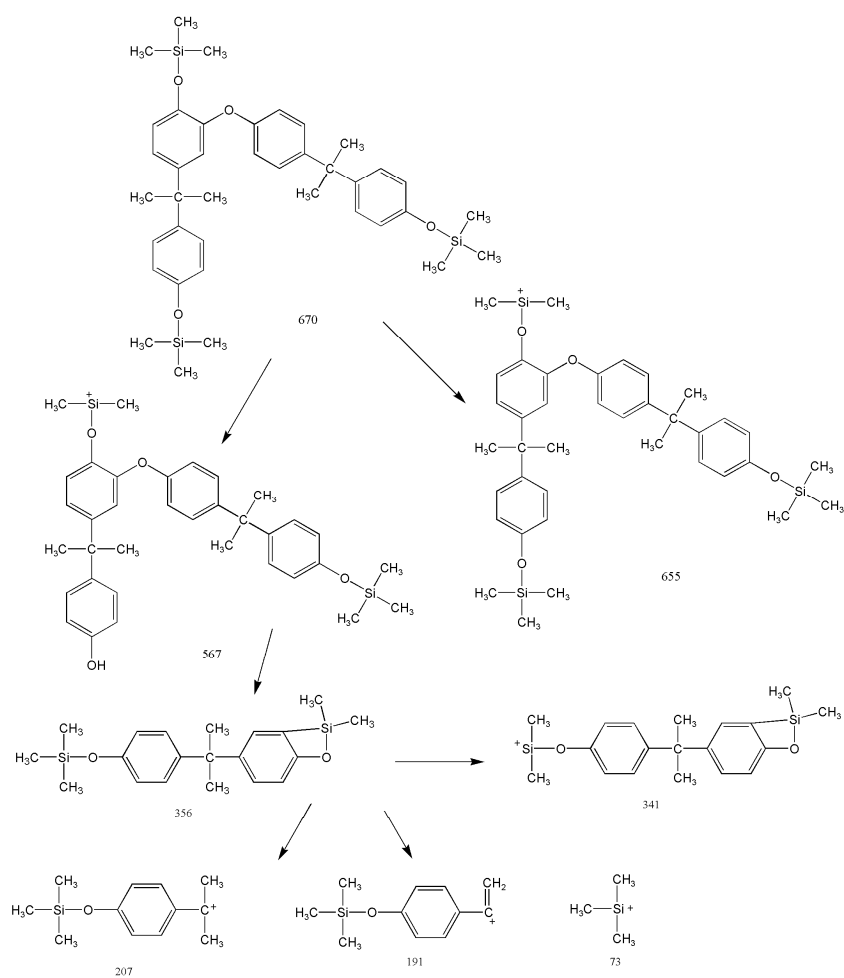

**Figure S5.** Proposed derivatized intermediates and their possible ion fragments

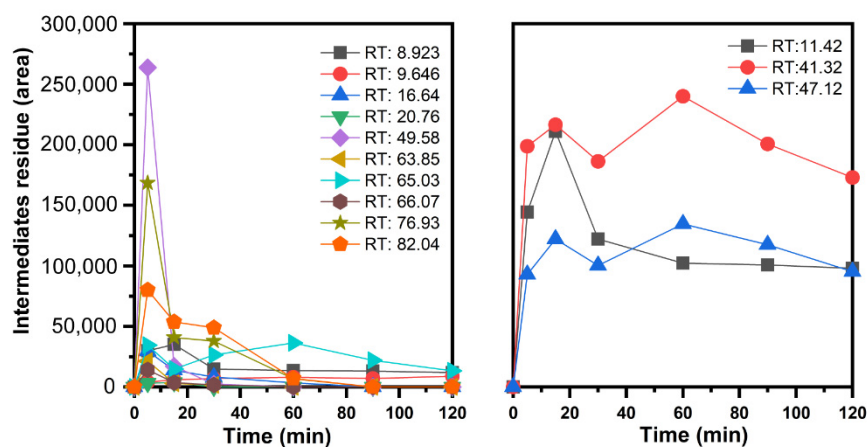

**Figure S6.** Intermediates residue in MnO<sub>2</sub>/UV/PS process

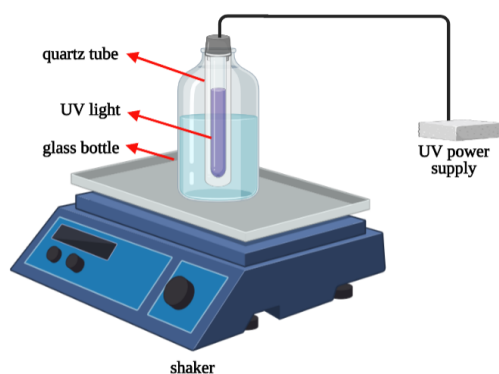

**Figure S7.** Schematic diagram of experimental device

**Table S1.** Parameters of BPA degradation following the pseudo-first-order kinetics with and without quenching (reaction time: 30 min; D: degradation efficiency)

| Processes            | Scavengers   | k (min <sup>-1</sup> ) | R <sup>2</sup> | D (%) |
|----------------------|--------------|------------------------|----------------|-------|
| UV/MnO <sub>2</sub>  | No quenching | 0.0132                 | 0.9724         | 34.0  |
|                      | MeOH (1 M)   | 0.0061                 | 0.9026         | 17.7  |
|                      | TBA (1 M)    | 0.0051                 | 0.9685         | 15.2  |
|                      | FFA (5 mM)   | 0.0044                 | 0.9732         | 13.1  |
| MnO <sub>2</sub> /PS | No quenching | 0.0333                 | 0.946          | 64.9  |
|                      | MeOH (1 M)   | 0.0164                 | 0.9631         | 39.6  |
|                      | TBA (1 M)    | 0.0268                 | 0.9934         | 55.0  |
|                      | FFA (5 mM)   | 0.0313                 | 0.9321         | 62.2  |
| UV/PS                | No quenching | 0.1178                 | 0.9622         | 97.5  |
|                      | MeOH (1 M)   | 0.0337                 | 0.9723         | 65.7  |
|                      | TBA (1 M)    | 0.0297                 | 0.963          | 61.2  |

|                         |              |        |        |      |
|-------------------------|--------------|--------|--------|------|
|                         | FFA (5 mM)   | 0.0109 | 0.9701 | 28.4 |
|                         | No quenching | 0.2196 | 0.9471 | 99.3 |
|                         | MeOH (1 M)   | 0.0469 | 0.9841 | 75.9 |
| MnO <sub>2</sub> /UV/PS | TBA (1 M)    | 0.0631 | 0.9716 | 86.2 |
|                         | FFA (5 mM)   | 0.0445 | 0.9547 | 74.1 |

**Table S2.** Degradation products of BPA under the MnO<sub>2</sub>/UV/PS process identified using GC-MS

| Retention time (min) | Molecular weight | Proposed structure                                                                   | No.        | References |
|----------------------|------------------|--------------------------------------------------------------------------------------|------------|------------|
| 8.92                 | 108              |     | <b>P1</b>  | —          |
| 9.65                 | 138              |     | <b>P2</b>  | —          |
| 11.42                | 124              |     | <b>P3</b>  | —          |
| 16.63                | 134              |   | <b>P4</b>  | [3-6]      |
| 20.76                | 136              |   | <b>P5</b>  | [5, 7]     |
| 41.32                | 256              |  | <b>P6</b>  | —          |
| 46.23                | 228              |   | <b>BPA</b> |            |
| 47.12                | 280              |  | <b>P7</b>  | —          |

|       |     |                                                                                     |            |         |
|-------|-----|-------------------------------------------------------------------------------------|------------|---------|
| 49.58 | 244 | 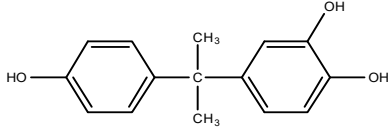   | <b>P8</b>  | [4, 5]  |
| 63.85 | 462 |   | <b>P9</b>  | —       |
| 65.03 | 336 |    | <b>P10</b> | —       |
| 66.07 | 320 |   | <b>P11</b> | [1]     |
| 76.93 | 454 |  | <b>P12</b> | [6, 8]  |
| 82.04 | 454 |  | <b>P13</b> | [9, 10] |

---

## References

- [1] J. Sharma, I. Mishra, D.D. Dionysiou, V. Kumar, Oxidative removal of Bisphenol A by UV-C/peroxymonosulfate (PMS): kinetics, influence of co-existing chemicals and degradation pathway, *Chemical Engineering Journal* 276 (2015) 193-204.
- [2] K. Lin, W. Liu, J. Gan, Oxidative removal of bisphenol A by manganese dioxide: efficacy, products, and pathways, *Environmental science & technology* 43 (2009) 3860-3864.
- [3] C. Guo, M. Ge, L. Liu, G. Gao, Y. Feng, Y. Wang, Directed synthesis of mesoporous TiO<sub>2</sub> microspheres: catalysts and their photocatalysis for bisphenol A degradation, *Environmental science & technology* 44 (2010) 419-425.
- [4] J. Lin, Y. Hu, L. Wang, D. Liang, X. Ruan, S. Shao, M88/PS/Vis system for degradation of bisphenol A: Environmental factors, degradation pathways, and toxicity evaluation, *Chemical Engineering Journal* 382 (2020) 122931.
- [5] L. Liu, X. Xu, Y. Li, R. Su, Q. Li, W. Zhou, B. Gao, Q. Yue, One-step synthesis of "nuclear-shell" structure iron-carbon nanocomposite as a persulfate activator for bisphenol A degradation, *Chemical Engineering Journal* 382 (2020) 122780.
- [6] E. de Freitas, G. Bubna, T. Brugnari, C. Kato, M. Nolli, T. Rauen, R. Moreira, R. Peralta, A. Bracht, C. de Souza, Removal of bisphenol A and evaluation of ecotoxicity of degradation products by laccases from *Pleurotus ostreatus* and *Pleurotus pulmonarius*, *Chem. Eng. J* 330 (2017) 1361-1369.
- [7] M. Inoue, Y. Masuda, F. Okada, A. Sakurai, I. Takahashi, M. Sakakibara, Degradation of bisphenol A using sonochemical reactions, *Water research* 42 (2008) 1379-1386.
- [8] C. Qi, X. Liu, Y. Li, C. Lin, J. Ma, X. Li, H. Zhang, Enhanced degradation of organic contaminants in water by peroxydisulfate coupled with bisulfite, *Journal of hazardous materials* 328 (2017) 98-107.
- [9] L.M. Divya, G.K. Prasanth, K.G. Arun, C. Sadasivan, Bisphenol-A carbonate dimer is a more preferred substrate for laccase mediated degradation than the Biphphenol-A in its monomeric and dimeric forms, *International biodeterioration & biodegradation* 135 (2018) 19-23.
- [10] J. Yao, R. Qu, X. Wang, V.K. Sharma, A. Shad, A.A. Dar, Z. Wang, Visible light and fulvic acid assisted generation of Mn (III) to oxidize bisphenol A: The effect of tetrabromobisphenol A, *Water research* 169 (2020) 115273.
